# Supplementary material for: Kinetic and mechanistic study on the reactions of ruthenium(ii) chlorophenyl terpyridine complexes with nucleobases, oligonucleotides and DNA
Source: Royal Society of Chemistry journal article supplement (doi:10.1039/c6dt04254f), 2016-12-30
Supplement: c6dt04254f1.pdf [file c6dt04254f1.pdf]

# Kinetic and mechanistic study on the reactions of ruthenium(II) chlorophenyl terpyridine complexes with nucleobases, oligonucleotides and DNA

Milan M. Milutinović,<sup>1,2</sup> Sofi K.C. Elmroth,<sup>2</sup> Goran Davidović,<sup>3</sup> Ana Rilak,<sup>1</sup> Olivera R. Klisurić,<sup>4</sup> Ioannis Bratsos,<sup>5</sup> Živadin D. Bugarčić,\*<sup>1</sup>

<sup>1</sup> *University of Kragujevac, Faculty of Science, R. Domanovića 12, P. O. Box 60, 34000 Kragujevac, Serbia.*

<sup>2</sup> *Lund University, Biochemistry and Structural Biology, KILU, P.O. Box 124 SE-221 00 Lund, Sweden.*

<sup>3</sup> *University of Kragujevac, Clinic for Cardiology, Clinical Center Kragujevac, Kragujevac, Serbia.*

<sup>4</sup> *University of Novi Sad, Faculty of Science, Department of Physics, Trg Dositeja Obradovića 3, 21000 Novi Sad, Serbia.*

<sup>5</sup> *I.N.N., Dept. of Physical Chemistry, NCSR "Demokritos", 15310 Ag. Paraskevi, Athens, Greece.*

*\*Corresponding author: Prof. Dr. Živadin D. Bugarčić, Department of Chemistry, Faculty of Science, University of Kragujevac, Radoja Domanovića 12, Kragujevac, Serbia, Tel: +381(0)34300262, Fax: +381(0)34335040, e-mail: [bugarcic@kg.ac.rs](mailto:bugarcic@kg.ac.rs)*

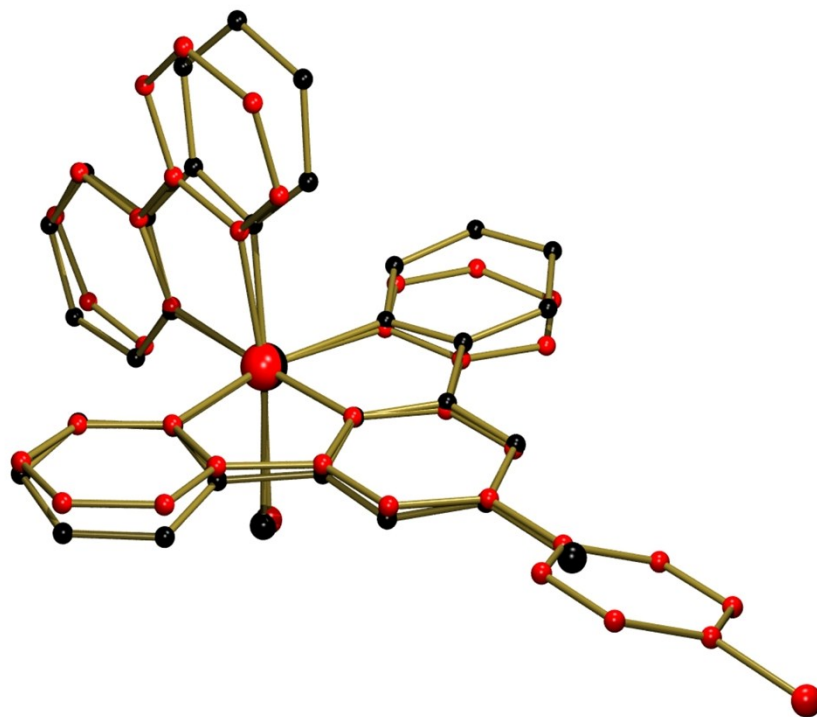

**Fig. S1.** PLATON<sup>19</sup> drawing showing an overlay of two complexes: [Ru(Cl-Ph-tpy)(bpy)Cl]Cl complex (**3**) (red atoms) and [Ru(Cl-tpy)(bpy)Cl]Cl (**3<sub>Cl</sub>**) (black atoms).

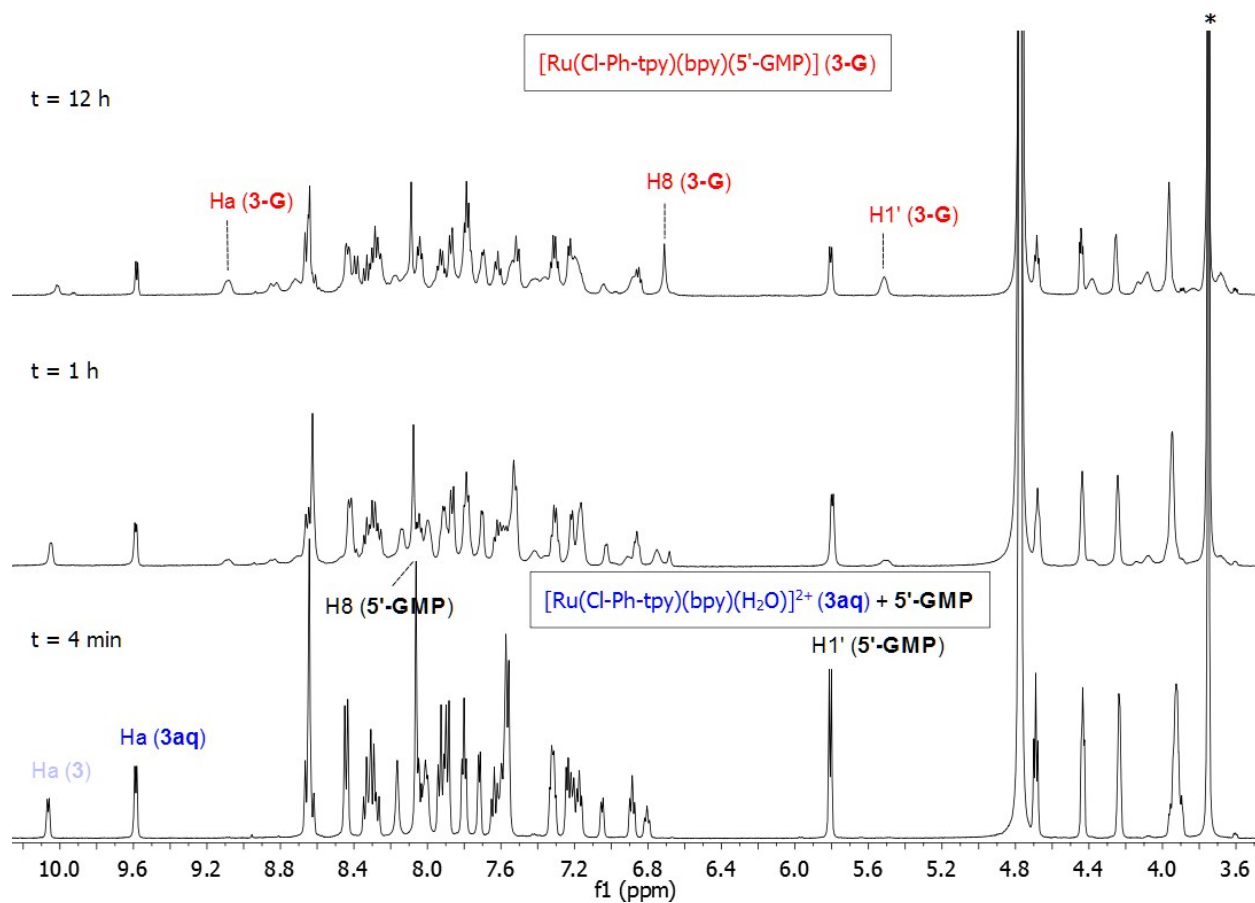

**Fig. S2.**  $^1\text{H}$  NMR spectral changes after the addition of 5'-GMP (1.1 equiv.) to an equilibrated solution of  $[\text{Ru}(\text{Cl-Ph-tpy})(\text{bpy})\text{Cl}]\text{Cl}$  (**3**; 10 mM) in  $\text{D}_2\text{O}$  at various reaction times. With \* is indicated the reference resonance of 1,4 dioxane.

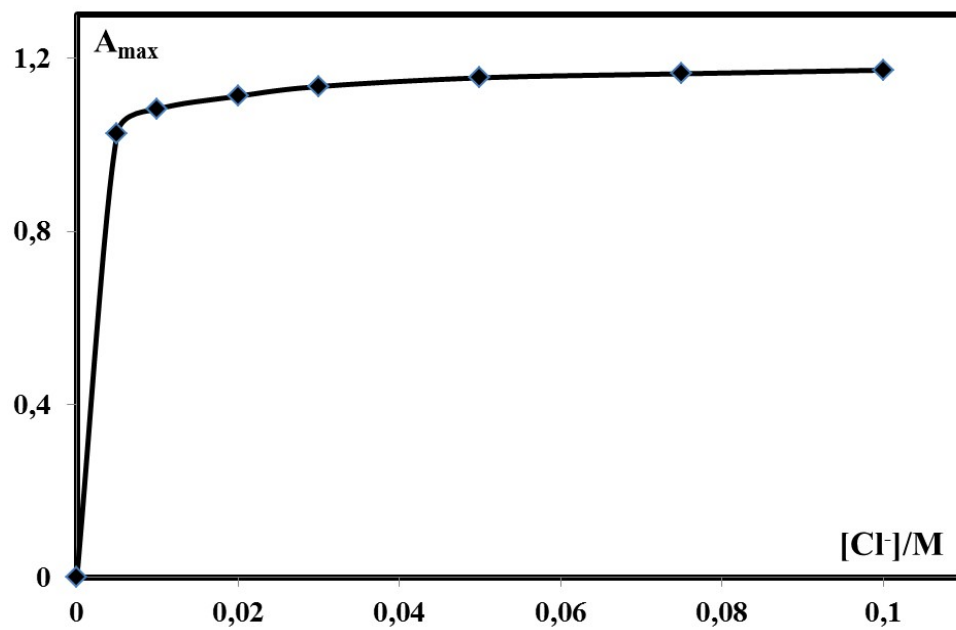

**Fig. S3.** The change of absorbance at 471 nm of the  $[Ru(Cl-Ph-tpy)(dach)Cl]^+$  (**2**) complex vs.  $[Cl^-]$  in 25 mM Hepes buffer at 37 °C.

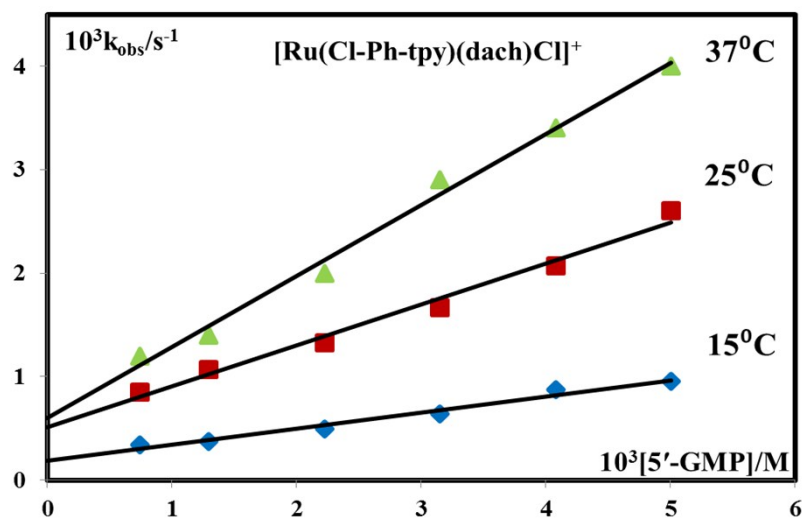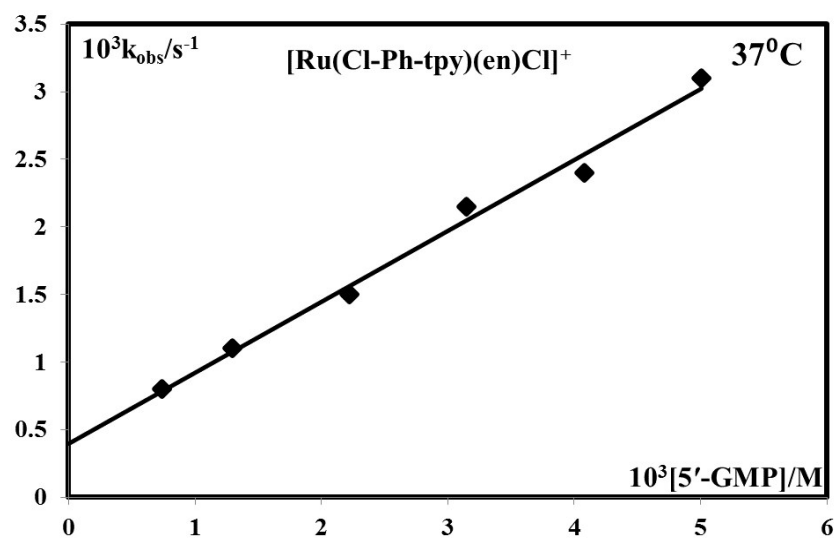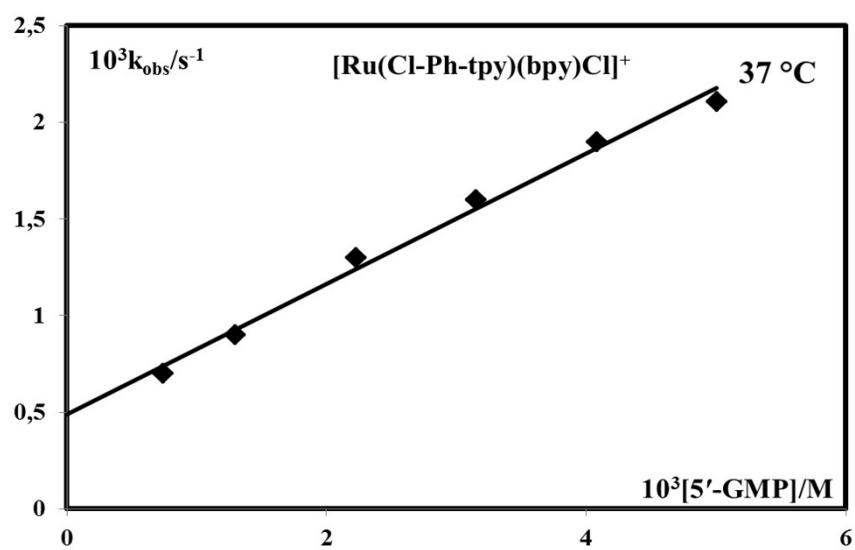

**Fig. S4.** *Pseudo*-first-order rate constants,  $k_{\text{obs}}$ , plotted as a function of ligand concentration and temperature for the substitution reactions of complexes **1** – **3** with 5'-GMP in 25 mM Hepes buffer (50 mM NaCl, pH = 7.2).

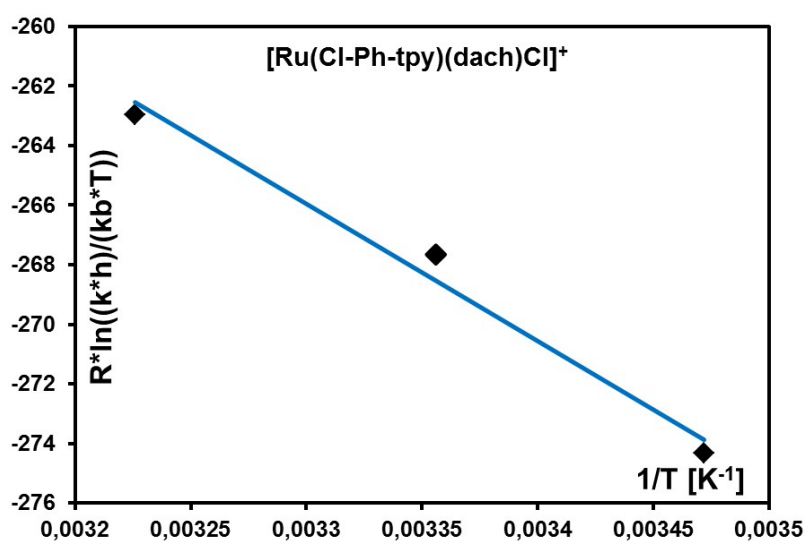

**Fig. S5.** Eyring plot for the reactions of complex **2** with 5'-GMP, at pH 7.20 in 25 mM Hepes buffer and 50 mM NaCl.

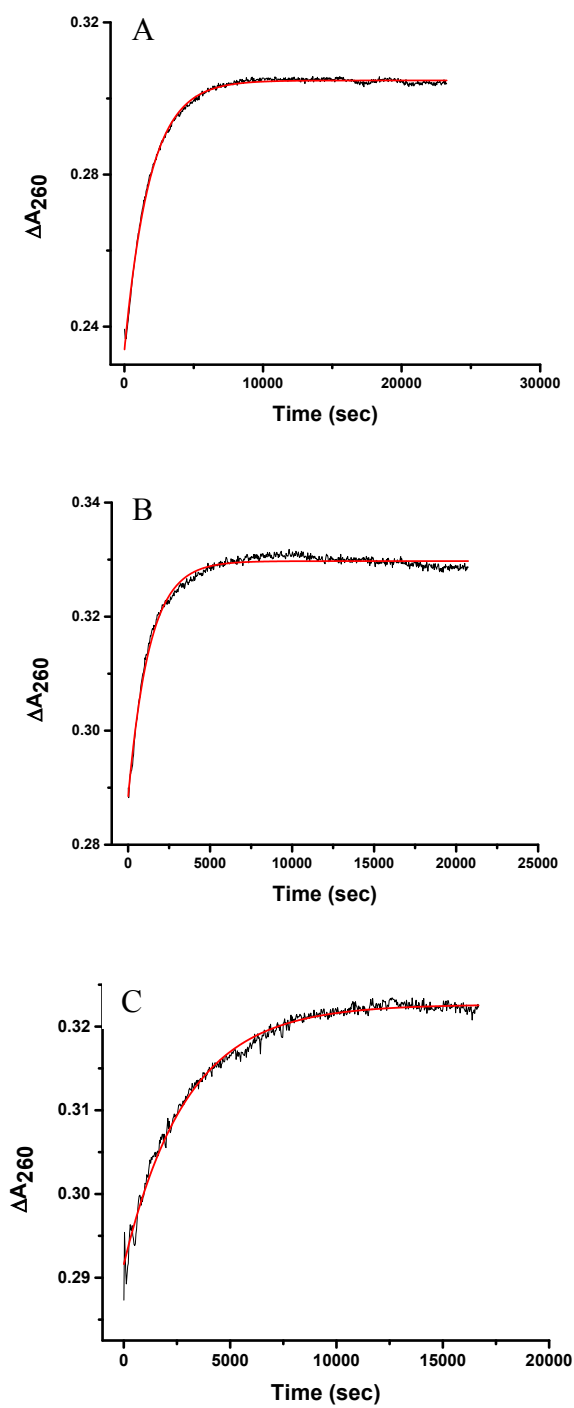

**Fig. S6.** Absorbance change as a function of time after the addition of complex **1** to DNA-1 (A), DNA-2 (B) and RNA (C) followed at  $\lambda = 260$  nm. All measurements were conducted with  $C_1 =$

30.0  $\mu\text{M}$ ,  $C_T = 3.0 \mu\text{M}$  and  $T = 37^\circ\text{C}$  in Tris-HCl buffered solution,  $\text{pH} = 7.2$ . Fits of a single-exponential function to the experimental data is indicated with a solid line (red).

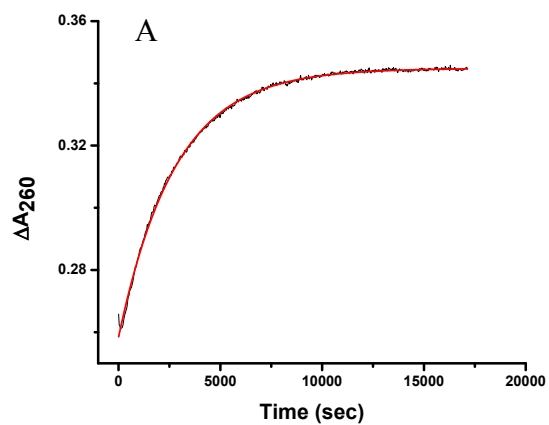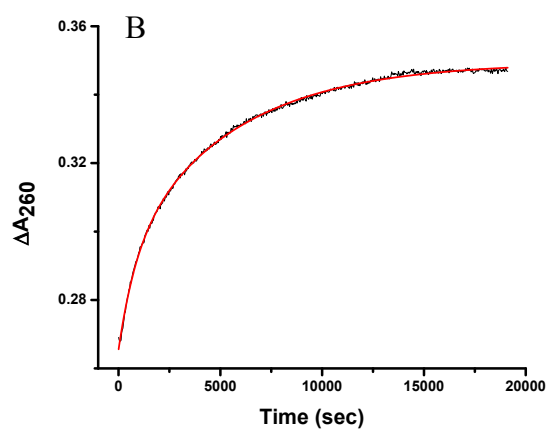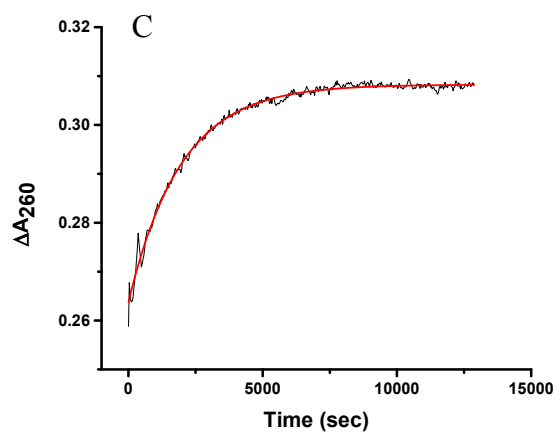

**Fig. S7.** Absorbance change as a function of time after the addition of complex **2** to DNA-1 (A), DNA-2 (B) and RNA (C) followed at  $\lambda = 260$  nm. All measurements were conducted with  $C_2 = 30.0 \mu\text{M}$ ,  $C_T = 3.0 \mu\text{M}$  and  $T = 37^\circ\text{C}$  in Tris-HCl buffered solution,  $\text{pH} = 7.2$ . Fits of a single-exponential function to the experimental data is indicated with a solid line (red).

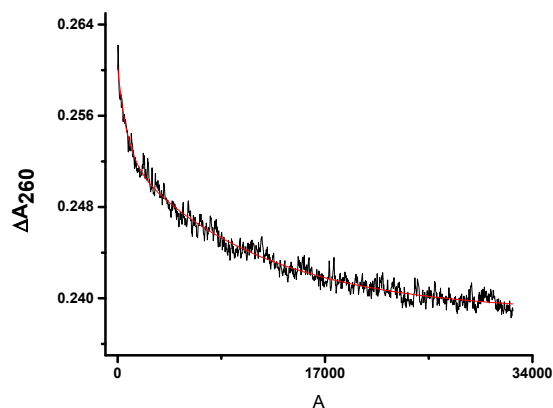

**Fig. S8.** Absorbance change as a function of time after the addition of complex **3** to DNA-1 followed at  $\lambda = 260$  nm. All measurements were conducted with  $C_3 = 30.0 \mu\text{M}$ ,  $C_T = 3.0 \mu\text{M}$  and  $T = 37^\circ\text{C}$  in Tris-HCl buffered solution,  $\text{pH} = 7.2$ . Fits of a single-exponential function to the experimental data is indicated with a solid line (red).

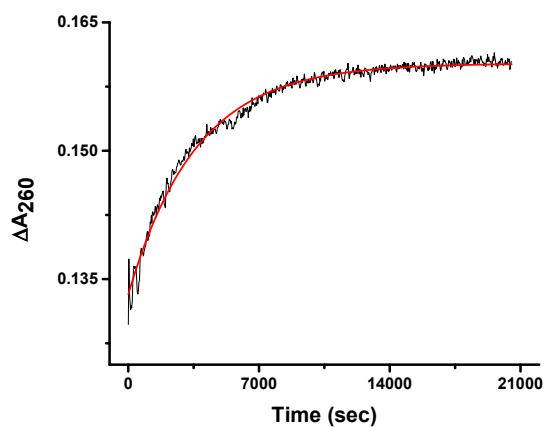

**Fig. S9.** Absorbance change as a function of time after the addition of complex **3** to RNA followed at  $\lambda = 260$  nm. All measurements were conducted with  $C_3 = 30.0$   $\mu\text{M}$ ,  $C_T = 3.0$   $\mu\text{M}$  and  $T = 37$   $^{\circ}\text{C}$  in Tris-HCl buffered solution, pH = 7.2. Fits of a single-exponential function to the experimental data is indicated with a solid line (red).

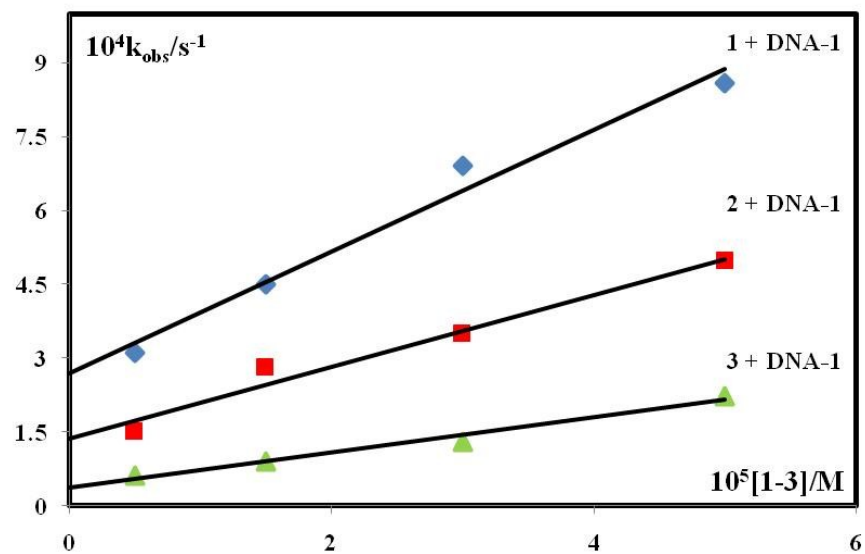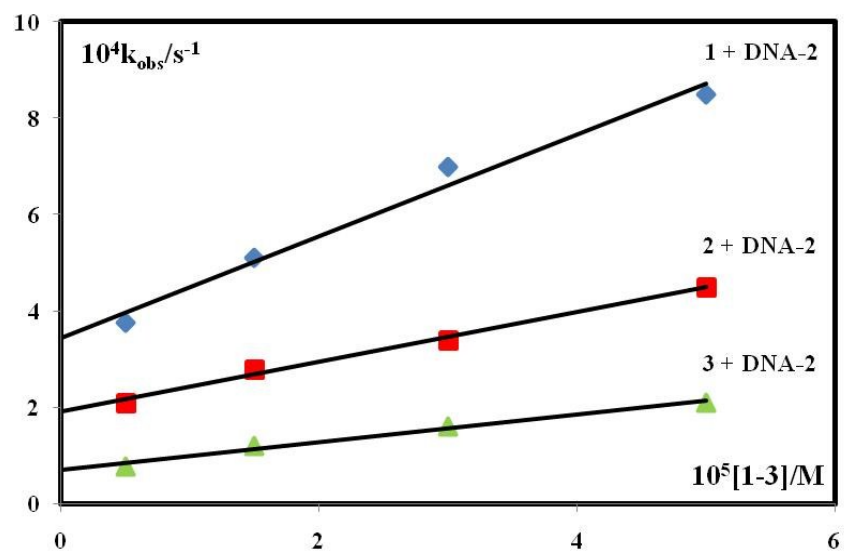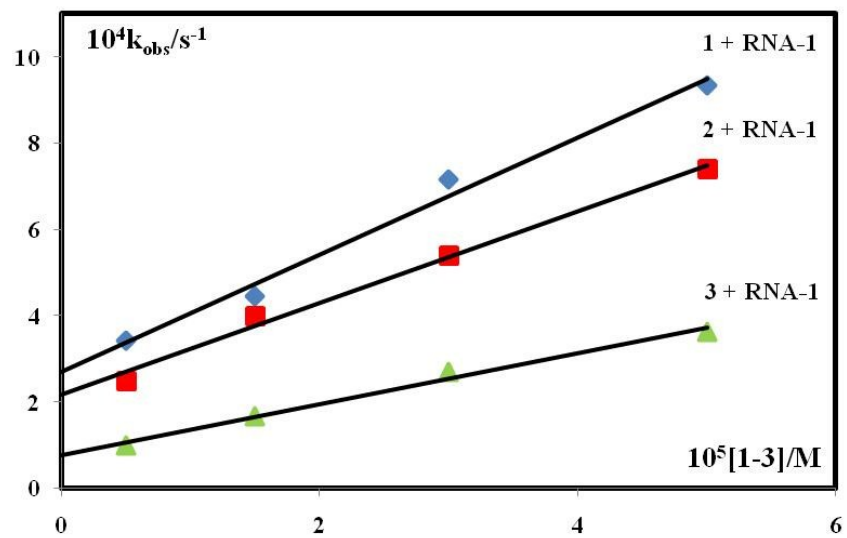

**Fig. S10.** Observed *pseudo*-first order rate constants,  $k_{\text{obs}}$ , plotted as a function of complex concentration in the interval of 5 – 50  $\mu\text{M}$  together with linear regression lines allowing for determination of  $k_{2,\text{app}}$  from the slope.

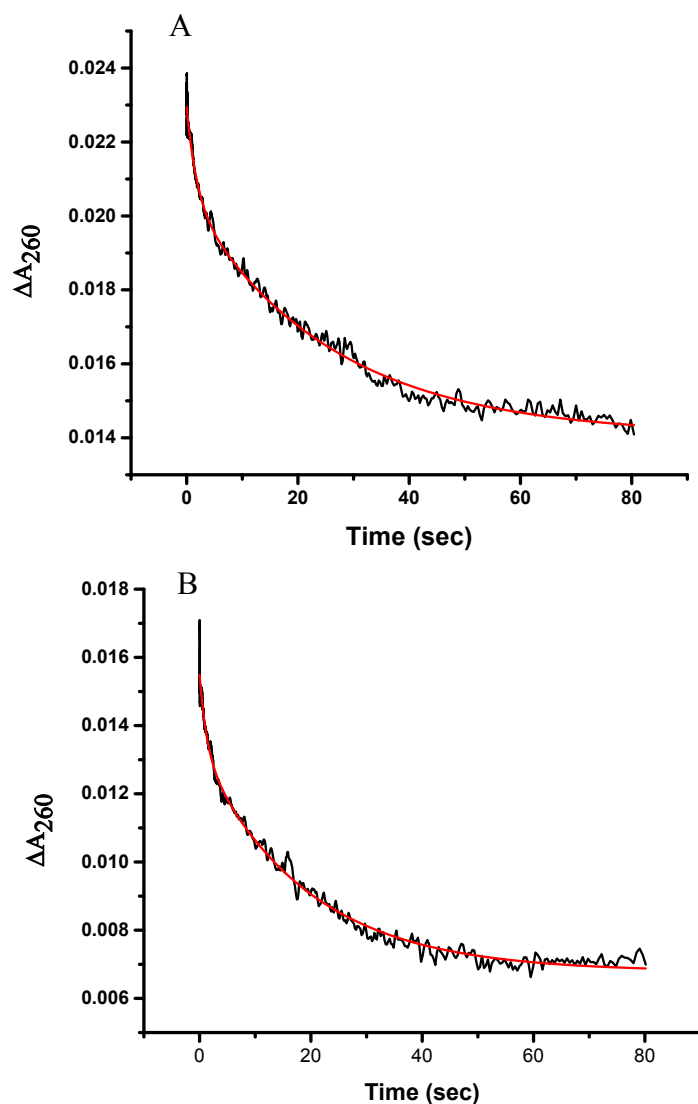

**Fig. S11.** Absorbance change as a function of time after the addition of complex 1 to CT DNA (A) and HT DNA (B) followed at  $\lambda = 260$  nm. All measurements were conducted with  $C_1 = 30.0$   $\mu\text{M}$ ,  $C_T = 50.0$   $\mu\text{M}$  and  $T = 37$   $^{\circ}\text{C}$  in Tris-HCl buffered solution,  $\text{pH} = 7.2$ . Fits of a single-exponential function to the experimental data is indicated with a solid line (red).

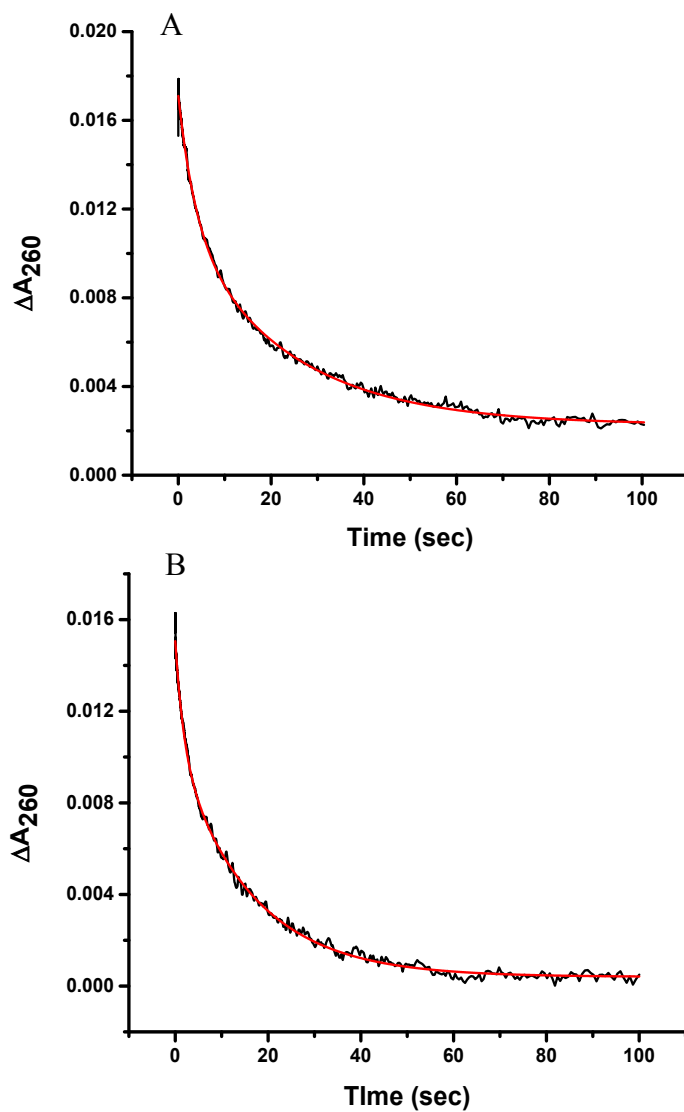

**Fig. S12.** Absorbance change as a function of time after the addition of complex **2** to CT DNA (A) and HT DNA (B) followed at  $\lambda = 260$  nm. All measurements were conducted with  $C_2 = 30.0$   $\mu\text{M}$ ,  $C_T = 50.0$   $\mu\text{M}$  and  $T = 37$   $^\circ\text{C}$  in Tris-HCl buffered solution, pH = 7.2. Fits of a single-exponential function to the experimental data is indicated with a solid line (red).

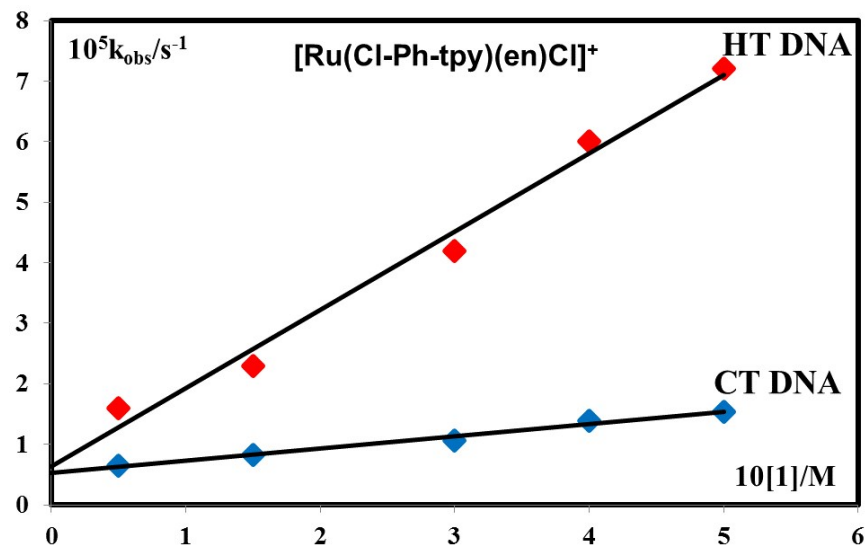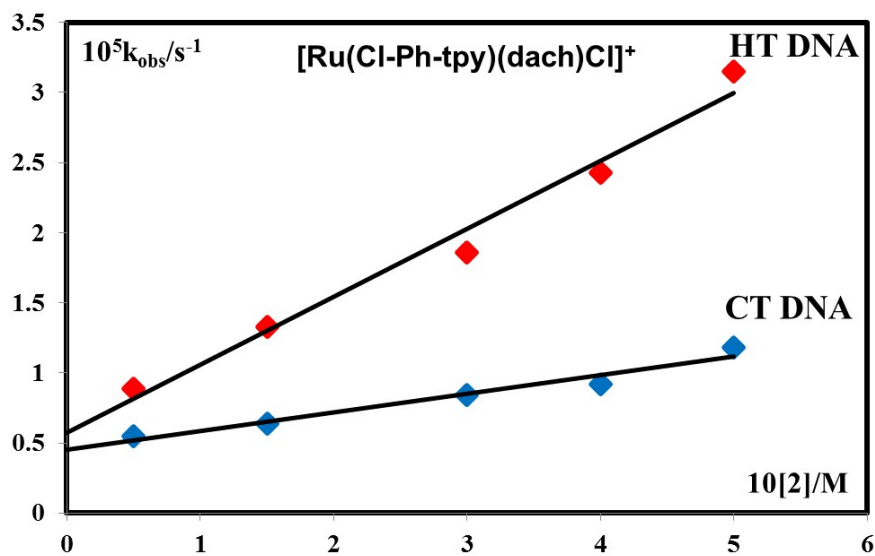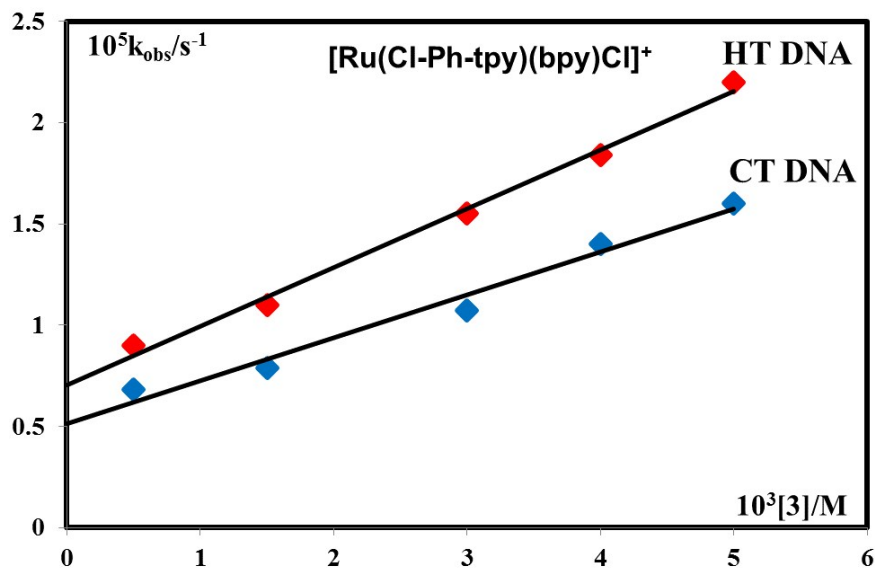

**Fig. S13.** Observed *pseudo*-first order rate constants,  $k_{\text{obs}}$ , plotted as a function of complex concentration in the interval of 5 – 50  $\mu\text{M}$  together with linear regression lines allowing for determination of  $k_2$  from the slope.

**Table S1.** Selected geometrical parameters for **3** and **3<sub>Cl</sub>**.

| Bond length [°]    |            |                         |
|--------------------|------------|-------------------------|
|                    | <b>3</b>   | <b>3<sub>Cl</sub></b> * |
| Ru1—N1             | 2.078(3)   | 2.067 (3)               |
| Ru1—N2             | 1.956(3)   | 1.953 (3)               |
| Ru1—N3             | 2.065(3)   | 2.064 (3)               |
| Ru1—N4             | 2.089(3)   | 2.079 (3)               |
| Ru1—N5             | 2.035(3)   | 2.032 (3)               |
| Ru1—Cl1            | 2.4078(9)  | 2.4205 (9)              |
| Bond angles [°]    |            |                         |
| N2—Ru1—N4          | 176.36(11) | 177.28(12)              |
| N2—Ru1—N1          | 79.55(11)  | 79.45(12)               |
| N4—Ru1—N1          | 100.27(11) | 101.42(12)              |
| N2—Ru1—N3          | 79.16(11)  | 79.62(12)               |
| N4—Ru1—N3          | 100.93(11) | 99.35(12)               |
| N1—Ru1—N3          | 158.70(10) | 158.84(12)              |
| N2—Ru1—N5          | 97.83(11)  | 99.50(12)               |
| N4—Ru1—N5          | 78.55(11)  | 78.06(12)               |
| N1—Ru1—N5          | 95.40(11)  | 84.91(12)               |
| N3—Ru1—N5          | 86.88(12)  | 95.53(12)               |
| N2—Ru1—Cl1         | 89.30(8)   | 88.44(9)                |
| N4—Ru1—Cl1         | 94.33(8)   | 93.99(9)                |
| N1—Ru1—Cl1         | 89.78(8)   | 96.82(8)                |
| N3—Ru1—Cl1         | 90.58(8)   | 85.66(8)                |
| Torsion angles [°] |            |                         |
| Ru1—N1—C5—C4       | 175.8 (2)  |                         |
| Ru1—N1—C5—C6       | -4.1 (3)   |                         |
| Ru1—N2—C6—C7       | -178.0 (2) |                         |
| Ru1—N2—C6—C5       | 2.1 (4)    |                         |
| Ru1—N2—C10—C9      | 178.1 (2)  |                         |
| Ru1—N2—C10—C11     | -2.3 (4)   |                         |
| Ru1—N3—C11—C12     | 175.1 (3)  |                         |
| Ru1—N3—C11—C10     | -3.4 (4)   |                         |

\* Data obtained from reference [10].

**Table S2.** Observed *pseudo*-first order rate constants as a function of complex concentration for the reaction between complex [Ru(Cl-Ph-tpy)(en)Cl]Cl (**1**) and 5'-GMP (**L**) in 25 mM Hepes buffer (50 mM NaCl, pH = 7.2) at 37 °C.

| t (°C) | $C_L$ [ $10^{-3}$ M] | $k_{\text{obs}}$ [ $10^{-3}$ s $^{-1}$ ] |
|--------|----------------------|------------------------------------------|
| 37.0   | 5.00                 | 3.10(3)                                  |
|        | 4.10                 | 2.40(2)                                  |
|        | 3.15                 | 2.15(3)                                  |
|        | 2.20                 | 1.50(3)                                  |
|        | 1.30                 | 1.10(2)                                  |
|        | 0.75                 | 0.80(3)                                  |

**Table S3.** Observed *pseudo*-first order rate constants as a function of complex concentration and temperature for the reaction between complex [Ru(Cl-Ph-tpy)(dach)Cl]Cl (**2**) and 5'-GMP (**L**) in 25 mM Hepes buffer (50 mM NaCl, pH = 7.2).

| t (°C) | C <sub>L</sub> [10 <sup>-3</sup> M] | k <sub>obs</sub> [10 <sup>-3</sup> s <sup>-1</sup> ] |
|--------|-------------------------------------|------------------------------------------------------|
| 15.0   | 5.00                                | 0.96(2)                                              |
|        | 4.10                                | 0.88(3)                                              |
|        | 3.15                                | 0.64(2)                                              |
|        | 2.20                                | 0.50(3)                                              |
|        | 1.30                                | 0.37(3)                                              |
|        | 0.75                                | 0.34(3)                                              |
| 25.0   | 5.00                                | 2.60(3)                                              |
|        | 4.10                                | 2.07(3)                                              |
|        | 3.15                                | 1.67(2)                                              |
|        | 2.20                                | 1.33(3)                                              |
|        | 1.30                                | 1.07(3)                                              |
|        | 0.75                                | 0.85(3)                                              |
| 37.0   | 5.00                                | 4.00(3)                                              |
|        | 4.10                                | 3.40(2)                                              |
|        | 3.15                                | 2.90(3)                                              |
|        | 2.20                                | 2.00(3)                                              |
|        | 1.30                                | 1.40(3)                                              |
|        | 0.75                                | 1.20(3)                                              |

**Table S4.** Observed *pseudo*-first order rate constants as a function of complex concentration for the reaction between complex [Ru(Cl-Ph-tpy)(bpy)Cl]Cl (**3**) and 5'-GMP (**L**) in 25 mM Hepes buffer (50 mM NaCl, pH = 7.2) at 37 °C.

| t °C | $C_L$ [ $10^{-3}$ M] | $k_{obs}$ [ $10^{-3}$ s $^{-1}$ ] |
|------|----------------------|-----------------------------------|
| 37.0 | 5.00                 | 2.11(2)                           |
|      | 4.10                 | 1.90(3)                           |
|      | 3.15                 | 1.70(2)                           |
|      | 2.20                 | 1.40(3)                           |
|      | 1.30                 | 0.90(3)                           |
|      | 0.75                 | 0.60(3)                           |

**Table S5.** Observed *pseudo*-first order rate constants as a function of complex concentration for the reaction between complex [Ru(Cl-Ph-tpy)(en)Cl]Cl (**1**) and DNA-1 in Tris-HCl buffer (50 mM NaCl, pH = 7.2).

| t °C | $C_1$ [ $10^{-5}$ M] | $k_{obs}$ [ $10^{-4}$ s $^{-1}$ ] |
|------|----------------------|-----------------------------------|
| 37.0 | 5.0                  | 8.60(3)                           |
|      | 3.0                  | 6.90(3)                           |
|      | 1.5                  | 4.50(2)                           |
|      | 0.5                  | 3.10(3)                           |

**Table S6.** Observed *pseudo*-first order rate constants as a function of complex concentration for the reaction between complex [Ru(Cl-Ph-tpy)(en)Cl]Cl (**1**) and DNA-2 in Tris-HCl buffer (50 mM NaCl, pH = 7.2).

| t °C | C <sub>1</sub> [10 <sup>-5</sup> M] | k <sub>obs</sub> [10 <sup>-4</sup> s <sup>-1</sup> ] |
|------|-------------------------------------|------------------------------------------------------|
| 37.0 | 5.0                                 | 8.50(2)                                              |
|      | 3.0                                 | 7.00(2)                                              |
|      | 1.5                                 | 5.10(3)                                              |
|      | 0.5                                 | 3.75(3)                                              |

**Table S7.** Observed *pseudo*-first order rate constants as a function of complex concentration for the reaction between complex [Ru(Cl-Ph-tpy)(en)Cl]Cl (**1**) and RNA in Tris-HCl buffer (50 mM NaCl, pH = 7.2).

| t °C | C <sub>1</sub> [10 <sup>-5</sup> M] | k <sub>obs</sub> [10 <sup>-4</sup> s <sup>-1</sup> ] |
|------|-------------------------------------|------------------------------------------------------|
| 37.0 | 5.0                                 | 9.34(3)                                              |
|      | 3.0                                 | 7.15(3)                                              |
|      | 1.5                                 | 4.45(2)                                              |
|      | 0.5                                 | 3.41(3)                                              |

**Table S8.** Observed *pseudo*-first order rate constants as a function of complex concentration for the reaction between complex [Ru(Cl-Ph-tpy)(dach)Cl]Cl (**2**) and DNA-1 in Tris-HCl buffer (50 mM NaCl, pH = 7.2).

| t °C | C <sub>2</sub> [10 <sup>-5</sup> M] | k <sub>obs</sub> [10 <sup>-4</sup> s <sup>-1</sup> ] |
|------|-------------------------------------|------------------------------------------------------|
| 37.0 | 5.0                                 | 4.97(2)                                              |
|      | 3.0                                 | 3.50(3)                                              |
|      | 1.5                                 | 2.80(2)                                              |
|      | 0.5                                 | 1.50(3)                                              |

**Table S9.** Observed *pseudo*-first order rate constants as a function of complex concentration for the reaction between complex [Ru(Cl-Ph-tpy)(dach)Cl]Cl (**2**) and DNA-2 in Tris-HCl buffer (50 mM NaCl, pH = 7.2).

| t °C | C <sub>2</sub> [10 <sup>-5</sup> M] | k <sub>obs</sub> [10 <sup>-4</sup> s <sup>-1</sup> ] |
|------|-------------------------------------|------------------------------------------------------|
| 37.0 | 5.0                                 | 4.50(3)                                              |
|      | 3.0                                 | 3.40(2)                                              |
|      | 1.5                                 | 2.80(2)                                              |
|      | 0.5                                 | 2.10(3)                                              |

**Table S10.** Observed *pseudo*-first order rate constants as a function of complex concentration for the reaction between complex [Ru(Cl-Ph-tpy)(dach)Cl]Cl (**2**) and RNA in Tris-HCl buffer (50 mM NaCl, pH = 7.2).

| t °C | C <sub>2</sub> [10 <sup>-5</sup> M] | k <sub>obs</sub> [10 <sup>-4</sup> s <sup>-1</sup> ] |
|------|-------------------------------------|------------------------------------------------------|
| 37.0 | 5.0                                 | 7.40(2)                                              |
|      | 3.0                                 | 5.40(3)                                              |
|      | 1.5                                 | 4.00(3)                                              |
|      | 0.5                                 | 2.50(3)                                              |

**Table S11.** Observed *pseudo*-first order rate constants as a function of complex concentration for the reaction between complex [Ru(Cl-Ph-tpy)(bpy)Cl]Cl (**3**) and DNA-1 in Tris-HCl buffer (50 mM NaCl, pH = 7.2).

| t °C | C <sub>3</sub> [10 <sup>-5</sup> M] | 10 <sup>4</sup> k <sub>obs</sub> /s <sup>-1</sup> |
|------|-------------------------------------|---------------------------------------------------|
| 37.0 | 5.0                                 | 2.23(3)                                           |
|      | 3.0                                 | 1.30(3)                                           |
|      | 1.5                                 | 0.89(3)                                           |
|      | 0.5                                 | 0.61 (2)                                          |

**Table S12.** Observed *pseudo*-first order rate constants as a function of complex concentration for the reaction between complex [Ru(Cl-Ph-tpy)(bpy)Cl]Cl (**3**) and DNA-2 in Tris-HCl buffer (50 mM NaCl, pH = 7.2).

| t °C | C <sub>3</sub> [10 <sup>-5</sup> M] | k <sub>obs</sub> [10 <sup>-4</sup> s <sup>-1</sup> ] |
|------|-------------------------------------|------------------------------------------------------|
| 37.0 | 5.0                                 | 2.10(2)                                              |
|      | 3.0                                 | 1.60(2)                                              |
|      | 1.5                                 | 1.20(3)                                              |
|      | 0.5                                 | 0.78(3)                                              |

**Table S13.** Observed *pseudo*-first order rate constants as a function of complex concentration for the reaction between complex [Ru(Cl-Ph-tpy)(bpy)Cl]Cl (**3**) and RNA in Tris-HCl buffer (50 mM NaCl, pH = 7.2).

| t °C | C <sub>3</sub> [10 <sup>-5</sup> M] | k <sub>obs</sub> [10 <sup>-4</sup> s <sup>-1</sup> ] |
|------|-------------------------------------|------------------------------------------------------|
| 37.0 | 5.0                                 | 3.63(3)                                              |
|      | 3.0                                 | 2.70(3)                                              |
|      | 1.5                                 | 1.65(3)                                              |
|      | 0.5                                 | 0.98(3)                                              |

**Table S14.** Observed *pseudo*-first order rate constants as a function of complex concentration for the reaction between complex [Ru(Cl-Ph-tpy)(en)Cl]Cl (**1**) and CT DNA in Tris-HCl buffer (50 mM NaCl, pH = 7.2).

| t °C | C <sub>1</sub> [10 <sup>-5</sup> M] | k <sub>obs</sub> [10 <sup>-1</sup> s <sup>-1</sup> ] |
|------|-------------------------------------|------------------------------------------------------|
| 37.0 | 5.00                                | 1.54(2)                                              |
|      | 4.00                                | 1.39(3)                                              |
|      | 3.00                                | 1.07(3)                                              |
|      | 1.50                                | 0.83(2)                                              |
|      | 0.50                                | 0.65(3)                                              |

**Table S15.** Observed *pseudo*-first order rate constants as a function of complex concentration for the reaction between complex [Ru(Cl-Ph-tpy)(en)Cl]Cl (**1**) and HT DNA in Tris-HCl buffer (50 mM NaCl, pH = 7.2).

| t °C | C <sub>1</sub> [10 <sup>-5</sup> M] | k <sub>obs</sub> [10 <sup>-1</sup> s <sup>-1</sup> ] |
|------|-------------------------------------|------------------------------------------------------|
| 37.0 | 5.00                                | 7.20(3)                                              |
|      | 4.00                                | 6.00(3)                                              |
|      | 3.00                                | 4.20(3)                                              |
|      | 1.50                                | 2.29(3)                                              |
|      | 0.50                                | 1.60(3)                                              |

**Table S16.** Observed *pseudo*-first order rate constants as a function of complex concentration for the reaction between complex [Ru(Cl-Ph-tpy)(dach)Cl]Cl (**2**) and CT DNA in Tris-HCl buffer (50 mM NaCl, pH = 7.2).

| t °C | C <sub>2</sub> [10 <sup>-5</sup> M] | k <sub>obs</sub> [10 <sup>-1</sup> s <sup>-1</sup> ] |
|------|-------------------------------------|------------------------------------------------------|
| 37.0 | 5.00                                | 1.18(3)                                              |
|      | 4.00                                | 0.92(3)                                              |
|      | 3.00                                | 0.84(2)                                              |
|      | 1.50                                | 0.64(3)                                              |
|      | 0.50                                | 0.55(3)                                              |

**Table S17.** Observed *pseudo*-first order rate constants as a function of complex concentration for the reaction between complex [Ru(Cl-Ph-tpy)(dach)Cl]Cl (**2**) and HT DNA in Tris-HCl buffer (50 mM NaCl, pH = 7.2).

| t °C | C <sub>2</sub> [10 <sup>-5</sup> M] | k <sub>obs</sub> [10 <sup>-1</sup> s <sup>-1</sup> ] |
|------|-------------------------------------|------------------------------------------------------|
| 37.0 | 5.00                                | 3.15(2)                                              |
|      | 4.00                                | 2.43(3)                                              |
|      | 3.00                                | 1.86(3)                                              |
|      | 1.50                                | 1.33(3)                                              |
|      | 0.50                                | 0.89(3)                                              |

**Table S18.** Observed *pseudo*-first order rate constants as a function of complex concentration for the reaction between complex [Ru(Cl-Ph-tpy)(bpy)Cl]Cl (**3**) and CT DNA in Tris-HCl buffer (50 mM NaCl, pH = 7.2).

| t °C | C <sub>3</sub> [10 <sup>-5</sup> M] | k <sub>obs</sub> [10 <sup>-3</sup> s <sup>-1</sup> ] |
|------|-------------------------------------|------------------------------------------------------|
| 37.0 | 5.00                                | 1.60(2)                                              |
|      | 4.00                                | 1.40(2)                                              |
|      | 3.00                                | 1.07(2)                                              |
|      | 1.50                                | 0.79(3)                                              |
|      | 0.50                                | 0.68(3)                                              |

**Table S19.** Observed *pseudo*-first order rate constants as a function of complex concentration for the reaction between complex [Ru(Cl-Ph-tpy)(bpy)Cl]Cl (**3**) and HT DNA in Tris-HCl buffer (50 mM NaCl, pH = 7.2).

| t °C | C <sub>3</sub> [10 <sup>-5</sup> M] | k <sub>obs</sub> [10 <sup>-3</sup> s <sup>-1</sup> ] |
|------|-------------------------------------|------------------------------------------------------|
| 37.0 | 5.00                                | 2.20(3)                                              |
|      | 4.00                                | 1.84(3)                                              |
|      | 3.00                                | 1.55(3)                                              |
|      | 1.50                                | 1.10(3)                                              |
|      | 0.50                                | 0.90(2)                                              |
